# Supplementary material for: Treatment of Cutaneous Leishmaniasis with Sodium Stibogluconate and Allopurinol in a Routine Setting in Ethiopia: Clinical and Patient-Reported Outcomes and Operational Challenges
Source: MDPI journal article supplement (doi:10.3390/tropicalmed8080414), 2023-08-14
Supplement: s1 [file s1]

## Supplementary Materials

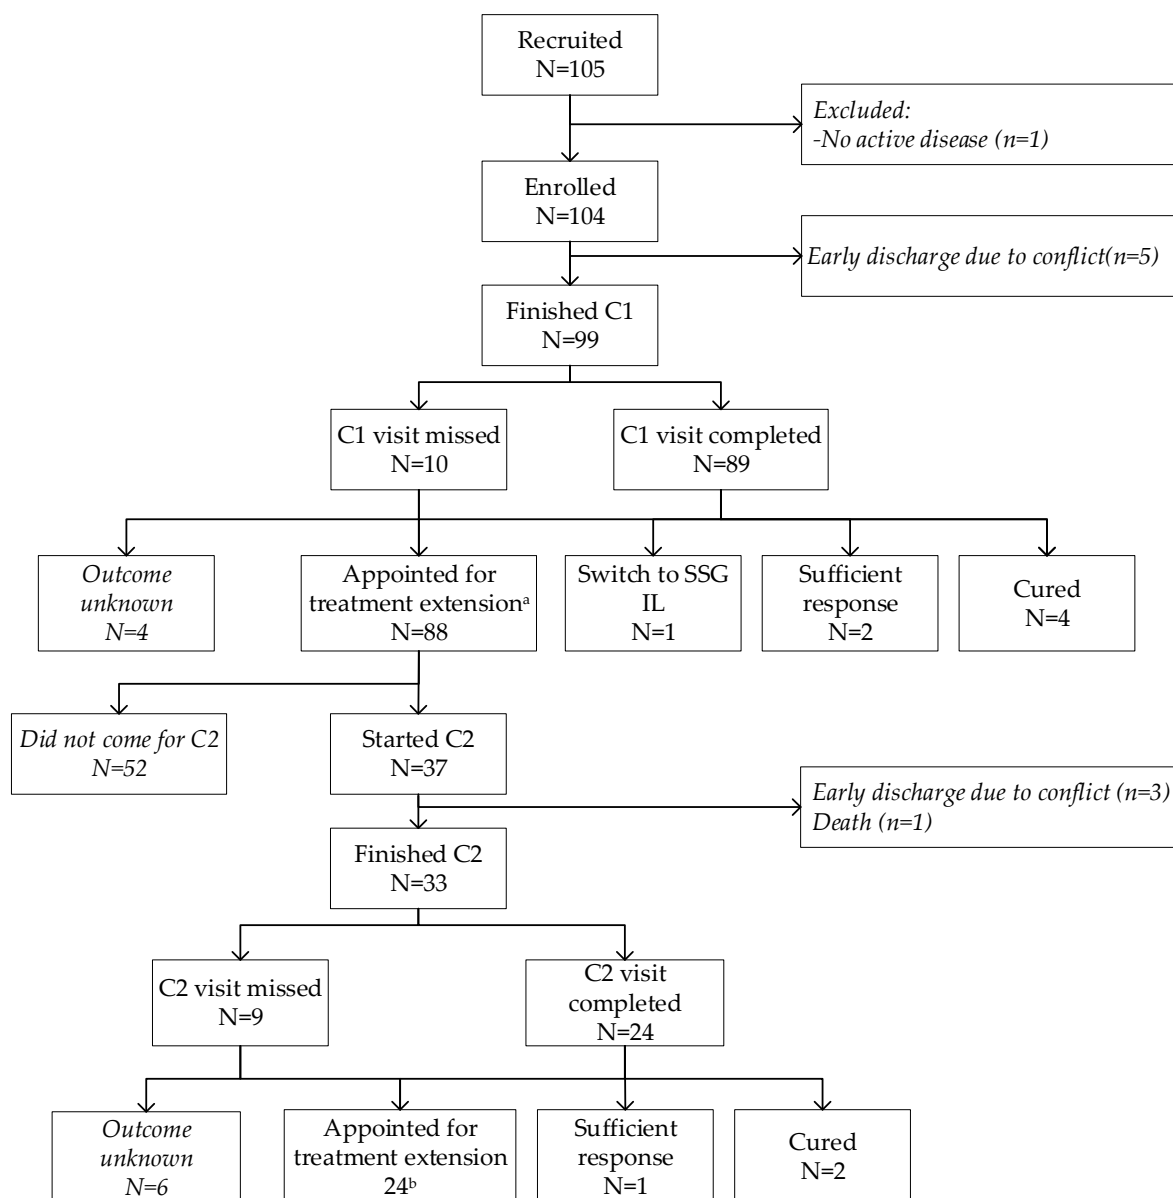

**Supplementary Figure S1.** Flowchart of included patients. <sup>a</sup>Among those extended, 82 completed C1 study visits and 6 did not. <sup>b</sup>Among those extended after C2, 21 completed C2 study visits and 3 did not.

**Supplementary Table S1:** Impact of cutaneous leishmaniasis on the dermatological life quality index before treatment for adults and children

| Category               | Total (%)<br>N=99        | Adults<br>N=56    | Children<br>N=43 |        |
|------------------------|--------------------------|-------------------|------------------|--------|
| No effect              | 6 (6.1)                  | 0 (0)             | 6 (14.0)         |        |
| Small effect           | 26 (26.3)                | 11 (19.6)         | 15 (34.9)        |        |
| Moderate effect        | 22(22.2)                 | 9 (16.1)          | 13 (30.2)        |        |
| Very large effect      | 35 (35.4)                | 30 (53.6)         | 5 (11.6)         |        |
| Extremely large effect | 10 (10.1)                | 6 (10.7)          | 4 (9.3)          |        |
| <i>Invalid</i>         | 4 (3.8)                  |                   |                  |        |
| Median                 | <b>10.0 (5.0 - 16.0)</b> | 12.5 (8.0 – 18.0) | 7.0 (3.0 – 11.0) | <0.001 |
| Mean                   | <b>10.7</b>              |                   | 7.8              |        |

**Supplementary Table S2.** Quality of life domains affected for adults at baseline (n=56)

| Category                     | No effect (0-1) | 2-3 points | 4-6 points | Median score    |
|------------------------------|-----------------|------------|------------|-----------------|
| Symptoms and feelings (0-6)  | 5 (8.9)         | 27 (48.2)  | 24 (42.9)  | 3.0 (2.8 - 4.0) |
| Daily activities (0-6)       | 15 (26.8)       | 26 (46.4)  | 15 (26.8)  | 2.0 (1.0 - 4.0) |
| Leisure (0-6)                | 21 (37.5)       | 25 (44.6)  | 10 (17.9)  | 2.0 (1.0 - 3.0) |
| School/work (0-3)            | 24 (42.9)       | 32 (57.1)  | -          | 2.0 (0 - 3.0)   |
| Personal relationships (0-6) | 26 (46.4)       | 16 (28.6)  | 14 (25.0)  | 2.0 (0 - 3.2)   |

**Supplementary Table S3.** Quality of life domains affected for children at baseline (n=43)

| Category                     | No effect (0-1) | 2-3 points | 4-9 points | Median score    |
|------------------------------|-----------------|------------|------------|-----------------|
| Symptoms and feelings (0-6)  | 21 (48.8)       | 15 (34.9)  | 7 (16.3)   | 2.0 (1.0 - 3.0) |
| Leisure (0-9)                | 25 (58.1)       | 6 (14.0)   | 12 (27.9)  | 1.0 (0 - 4.0)   |
| School/work (0-3)            | 28 (65.1)       | 15 (37.2)  | -          | 1.0 (0 - 3.0)   |
| Personal relationships (0-6) | 30 (69.8)       | 12 (27.9)  | 1 (2.3)    | 0 (0 - 2.0)     |
| Sleep (0-3)                  | 38 (88.4)       | 5 (11.6)   | -          | 0 (0 - 0)       |

**Supplementary Table S4.** Strobe checklist. STROBE Statement—checklist of items that should be included in reports of observational studies

|                          | Item No | Recommendation                                                                                                                                                                       | Manuscript section and paragraph no.                                               |
|--------------------------|---------|--------------------------------------------------------------------------------------------------------------------------------------------------------------------------------------|------------------------------------------------------------------------------------|
| Title and abstract       | 1       | (a) Indicate the study’s design with a commonly used term in the title or the abstract                                                                                               | Abstract paragraph 2                                                               |
|                          |         | (b) Provide in the abstract an informative and balanced summary of what was done and what was found                                                                                  | Abstract paragraph 2 and 3                                                         |
| Introduction             |         |                                                                                                                                                                                      |                                                                                    |
| Background/rationale     | 2       | Explain the scientific background and rationale for the investigation being reported                                                                                                 | Introduction paragraph 2-4                                                         |
| Objectives               | 3       | State specific objectives, including any prespecified hypotheses                                                                                                                     | Introduction paragraph 5                                                           |
| Methods                  |         |                                                                                                                                                                                      |                                                                                    |
| Study design             | 4       | Present key elements of study design early in the paper                                                                                                                              | Methods: design, population, recruitment and sample size: paragraph 1              |
| Setting                  | 5       | Describe the setting, locations, and relevant dates, including periods of recruitment, exposure, follow-up, and data collection                                                      | Methods: design, population, recruitment and sample size: paragraph 1              |
| Participants             | 6       | (a) Cohort study—Give the eligibility criteria, and the sources and methods of selection of participants. Describe methods of follow-up                                              | Methods: design, population, recruitment and sample size: paragraph 1,2            |
|                          |         | Case-control study—Give the eligibility criteria, and the sources and methods of case ascertainment and control selection. Give the rationale for the choice of cases and controls   | Methods: clinical outcome assessment paragraph 1-2                                 |
|                          |         | Cross-sectional study—Give the eligibility criteria, and the sources and methods of selection of participants                                                                        | Methods: patient tracing                                                           |
|                          |         | (b) Cohort study—For matched studies, give matching criteria and number of exposed and unexposed                                                                                     |                                                                                    |
|                          |         | Case-control study—For matched studies, give matching criteria and the number of controls per case                                                                                   |                                                                                    |
| Variables                | 7       | Clearly define all outcomes, exposures, predictors, potential confounders, and effect modifiers. Give diagnostic criteria, if applicable                                             | Methods: Clinical outcome assessment<br>Methods: patient-reported outcome measures |
| Data sources/measurement | 8*      | For each variable of interest, give sources of data and details of methods of assessment (measurement). Describe comparability of assessment methods if there is more than one group | Methods: Clinical outcome assessment<br>Methods: patient-reported outcome measures |
| Bias                     | 9       | Describe any efforts to address potential sources of bias                                                                                                                            | Methods: patient tracing                                                           |

|                        |     |                                                                                                                                                                                                                                                                                                           |                                                                                        |
|------------------------|-----|-----------------------------------------------------------------------------------------------------------------------------------------------------------------------------------------------------------------------------------------------------------------------------------------------------------|----------------------------------------------------------------------------------------|
| Study size             | 10  | Explain how the study size was arrived at                                                                                                                                                                                                                                                                 | Methods: design, population, recruitment and sample size: paragraph 3                  |
| Quantitative variables | 11  | Explain how quantitative variables were handled in the analyses. If applicable, describe which groupings were chosen and why                                                                                                                                                                              | Methods: patient-reported outcome measures<br>Other variables are kept as quantitative |
| Statistical methods    | 12  | (a) Describe all statistical methods, including those used to control for confounding                                                                                                                                                                                                                     | Methods: data collection and analysis                                                  |
|                        |     | (b) Describe any methods used to examine subgroups and interactions                                                                                                                                                                                                                                       | NA                                                                                     |
|                        |     | (c) Explain how missing data were addressed                                                                                                                                                                                                                                                               | Missing data is described in tables as separate category.                              |
|                        |     | (d) <i>Cohort study</i> —If applicable, explain how loss to follow-up was addressed<br><i>Case-control study</i> —If applicable, explain how matching of cases and controls was addressed<br><i>Cross-sectional study</i> —If applicable, describe analytical methods taking account of sampling strategy | Methods: patient tracing                                                               |
|                        |     | (e) Describe any sensitivity analyses                                                                                                                                                                                                                                                                     |                                                                                        |
| Results                |     |                                                                                                                                                                                                                                                                                                           |                                                                                        |
| Participants           | 13* | (a) Report numbers of individuals at each stage of study—eg numbers potentially eligible, examined for eligibility, confirmed eligible, included in the study, completing follow-up, and analysed                                                                                                         | Supplementary figure 1                                                                 |
|                        |     | (b) Give reasons for non-participation at each stage                                                                                                                                                                                                                                                      |                                                                                        |
|                        |     | (c) Consider use of a flow diagram                                                                                                                                                                                                                                                                        |                                                                                        |
| Descriptive data       | 14* | (a) Give characteristics of study participants (eg demographic, clinical, social) and information on exposures and potential confounders                                                                                                                                                                  | Table 1                                                                                |
|                        |     | (b) Indicate number of participants with missing data for each variable of interest                                                                                                                                                                                                                       | Table 1-3                                                                              |
|                        |     | (c) <i>Cohort study</i> —Summarise follow-up time (eg, average and total amount)                                                                                                                                                                                                                          | Results: treatment and follow-up                                                       |
| Outcome data           | 15* | <i>Cohort study</i> —Report numbers of outcome events or summary measures over time                                                                                                                                                                                                                       | Results: treatment and follow-up, Table 3                                              |
|                        |     | <i>Case-control study</i> —Report numbers in each exposure category, or summary measures of exposure                                                                                                                                                                                                      |                                                                                        |
|                        |     | <i>Cross-sectional study</i> —Report numbers of outcome events or summary measures                                                                                                                                                                                                                        |                                                                                        |
| Main results           | 16  | (a) Give unadjusted estimates and, if applicable, confounder-adjusted estimates and their precision (eg, 95% confidence interval). Make clear which confounders were adjusted for and why they were included                                                                                              | Table 2-3                                                                              |

|                          |    |                                                                                                                                                                            |                          |
|--------------------------|----|----------------------------------------------------------------------------------------------------------------------------------------------------------------------------|--------------------------|
|                          |    | (b) Report category boundaries when continuous variables were categorized                                                                                                  | NA                       |
|                          |    | (c) If relevant, consider translating estimates of relative risk into absolute risk for a meaningful time period                                                           |                          |
| Other analyses           | 17 | Report other analyses done—eg analyses of subgroups and interactions, and sensitivity analyses                                                                             | NA                       |
| <b>Discussion</b>        |    |                                                                                                                                                                            |                          |
| Key results              | 18 | Summarise key results with reference to study objectives                                                                                                                   | Discussion: paragraph 1  |
| Limitations              | 19 | Discuss limitations of the study, taking into account sources of potential bias or imprecision. Discuss both direction and magnitude of any potential bias                 | Discussion: paragraph 10 |
| Interpretation           | 20 | Give a cautious overall interpretation of results considering objectives, limitations, multiplicity of analyses, results from similar studies, and other relevant evidence | Discussion               |
| Generalisability         | 21 | Discuss the generalisability (external validity) of the study results                                                                                                      | NA                       |
| <b>Other information</b> |    |                                                                                                                                                                            |                          |
| Funding                  | 22 | Give the source of funding and the role of the funders for the present study and, if applicable, for the original study on which the present article is based              | Funding statement        |

\*Give information separately for cases and controls in case-control studies and, if applicable, for exposed and unexposed groups in cohort and cross-sectional studies.

**Note:** An Explanation and Elaboration article discusses each checklist item and gives methodological background and published examples of transparent reporting. The STROBE checklist is best used in conjunction with this article (freely available on the Web sites of PLoS Medicine at <http://www.plosmedicine.org/>, Annals of Internal Medicine at <http://www.annals.org/>, and Epidemiology at <http://www.epidem.com/>). Information on the STROBE Initiative is available at [www.strobe-statement.org](http://www.strobe-statement.org).
